# Supplementary material
Source: PubMed Central journal article supplement (PMC3870672)
Supplement: 1320369110_pnas.201320369SI.pdf [file 1320369110_pnas.201320369SI.pdf]

# Supporting Information

Zhao et al. 10.1073/pnas.1320369110

## SI Materials and Methods

**Animals and Hypoxia Treatment.** *Myospalax baileyi* (250–350 g; Fig. 1B) and *Microtus oeconomus* (18–25 g; Fig. 1B) were captured from the field near Haibei Research Station of the Alpine Meadow Ecosystem, Chinese Academy of Sciences (37°39'N, 101°19'E) in Qinghai, China. The body temperature (rectum) on average is ~35 °C (range, 33–37 °C) in *M. baileyi* and ~36 °C (range, 34–38 °C) in *Microtus oeconomus*. The body temperature changes with fluctuations of the environmental temperature. *M. cansus* (250–300 g; Fig. 1B) were captured from the field near Yan'an, north Shaanxi (36°36'N, 109°31'E), China. Adult male Sprague–Dawley rats (150–200 g; certification no. SCXK20080033) were purchased from the Experimental Animal Center, Zhejiang Academy of Medical Science. Rats were maintained at room temperature in a 12 h/12 h light/dark cycle with free access to food and water. For hypoxia treatment, laboratory rats were placed in a hypobaric chamber (FLYDWC50-IIC; Avic Guizhou Fenglei Aviation Armament Co., Ltd.). The rats were subjected to 16.0%, 10.8%, or 8.0% hypoxia to mimic altitudes of 2 km, 5 km, or 7 km for 8 h. Hypoxia treatment of *M. baileyi* and *Microtus oeconomus* was carried out by placing animals in a sealed chamber filled with mixed gas of 8% O<sub>2</sub> and 92% N<sub>2</sub>. Animals were killed by decapitation, and tissues were removed, immediately frozen in liquid nitrogen, and stored in –80 °C.

**Cloning of *M. baileyi*, *M. cansus*, and *Microtus oeconomus* p53.** *M. baileyi* and *M. cansus* p53 cDNAs were cloned from mRNAs extracted from the brain or liver of *M. baileyi* (GenBank accession no. JX998170) and *M. cansus* (GenBank accession no. JX998172). *Microtus oeconomus* p53 cDNA was cloned from mRNA extracted from the brain or liver of three adults (GenBank accession no. JX998171). Primers were designed based on human (NM\_000546), mouse (NM\_011640), and *Spalax* (AJ783406) p53 sequences in GenBank. To confirm the authenticity of each varied codon, further p53 was cloned from five more individuals of each species.

**Multiple Alignment Tools, Phylogenetic Tree, and Evolutionary Analysis.** Alignment of p53 protein sequences from *M. baileyi*, *M. cansus*, *Microtus oeconomus*, and 32 other species was generated using Multalin software (<http://multalin.toulouse.inra.fr/multalin/>) (1). The phylogenetic tree of p53 was constructed based on the amino acid sequences with ClustalW and Mega 4 software, using the neighbor-joining method (2). The numbers besides the branches are branch length, referring to the distance between the sequences (Figs. 1 and S1). The positive site test was performed using PAML 4 (3) software and was tested with the branch-site test as previously described (4, 5).

**Cell Cultures.** NCI-H1299 [human non-small cell lung cancer, American Type Culture Collection (ATCC) CRL-5803] and HeLa (human cervical cancer, ATCC CCL-2) cell lines were grown in RPMI medium 1640 (Gibco) or DMEM (Gibco), respectively, containing 10% (vol/vol) FBS, 2 mM glutamine, 100 µg/mL streptomycin, and 100 U/mL penicillin at 37 °C in a humidified incubator with 5% (vol/vol) CO<sub>2</sub>.

**Hypoxia, Cold, and Acid Treatments.** The hypoxia treatment was performed using the Proox Model P110 and ProCO<sub>2</sub> Model P120 hypoxia systems (BioSpherix). The medium was replaced 6 h posttransfection, and cells were moved to the hypoxia incubator in which the oxygen level was set as indicated. For the cold treat-

ment, transfected cells were moved to incubators of 37 °C or 30 °C for 24 h before harvesting (6, 7). For the acid treatment, medium with 20 mM Hepes was regulated to pH 7.4, 6.6, or 6.0 by titration with 1 M HCl according to the published protocol (8).

**Quantitative Real-Time RT-PCR.** mRNA quantities were determined by real-time RT-PCR. Primers were synthesized according to the rat, *M. baileyi*, and *Microtus oeconomus* p53 cDNA sequences as follows: rat p53-1: 5'-ATG CTG AGT ATC TGG ACG AC-3'; Rat p53-2: 5'-GAC AGG CAC AAA CAC GAA CC-3'; *M. baileyi* p53-1: 5'-CAC CTC GCT GTC ACC CAA-3'; *M. baileyi* p53-2: 5'-AGC CCA GAC GGA AAC CAT-3'; *Microtus oeconomus* p53-1: 5'-TCG CTG TCA GTT GAT GCC-3'; *Microtus oeconomus* p53-2: 5'-TTC GCC CTG GTA GGT TTT-3'; 18S rRNA-1: GTAACCCGTTGAACCCATT; 18S rRNA-2: CCATCCAATCGGTAGTAGCG.

For endogenous p53 target genes, primers were synthesized according to the cDNA sequences of each gene from the human: IGF-I binding protein-3 (*IGFBP3*)-F: 5'-TTCCCAACTGTGACAAGAAGG-3'; *IGFBP3*-R: 5'-GGAGAGGCTGCCCATAC-3'; Apoptotic protease activating factor 1 (*Apaf1*)-F: 5'-ACACCTTCTTGGACGACAGCC-3'; *Apaf1*-R: 5'-GGCGGACAATAAGCGGAAAG-3'; BCL2-associated X protein (*Bax*)-F: 5'-CTGACGGCAACTTCAACTG-3'; *Bax*-R: 5'-AGGAGTCTCACCCAACCAC-3'; P53 upregulated modulator of apoptosis (*Puma*)-F: 5'-CTGCTGCCCGTGCCTACCT-3'; *Puma*-R: 5'-AGCGAGAGCGAGGGCTGAGG-3'; the Bcl-2 homology 3 (BH3)-only pro-apoptotic protein (*Noxa*)-F: 5'-GCAAGACGCTCAACCGAG-3'; *Noxa*-R: 5'-GGTTCCTGAGCAGAAGAGT-3'.

**Western Blotting.** Western blotting was performed to determine the p53 protein levels in *M. baileyi* and *Microtus oeconomus* liver. A monoclonal antibody against p53 (1C12; Cell Signaling) was used. Samples were homogenated and lysed in 200 µL RIPA Lysis Buffer (Beyotime) with 1 mM PMSF. Extracts were centrifuged at 14,000 × g for 15 min at 4 °C. After the addition of 6× loading buffer, all samples were boiled at 95 °C for 5 min. Protein samples were subjected to electrophoresis. Proteins were transferred to PVDF membrane and were incubated with indicated antibodies. The samples were visualized with ECL.

**Plasmids.** For p53-expression plasmids, the coding regions of human, *M. baileyi*, *M. cansus*, and *Microtus oeconomus* WT p53 were ligated into a pcDNA3.1<sup>+</sup> expression vector. Site-directed mutagenesis was performed using the QuikChange XL site-directed mutagenesis kit (Stratagene). The underlining in primers used to change the amino acids: *M. baileyi* 322delete: 5'-CCC AAG AAG AAG CCA CTA GAT GGA GAA TAT TTC ACC C-3'; 5'-GGG TGA AAT ATT CTC CAT CTA GTG GCT TCT TCT TGG G-3'; *M. baileyi* N104S: 5'-CCA GAA AAC CTA CCA GGG CAG CTA TGG TTT CCG-3'; 5'-CTG CCC TGG TAG GTT TTC TGG GAA GGG ACT G-3'; *M. cansus* S104N: 5'-CCA GAA AAC CTA CCA GGG CAA CTA TGG TTT CCG-3'; 5'-TTG CCC TGG TAG GTT TTC TGG GAA GGG ACT G-3'; *M. baileyi* C127A: 5'-TCA CAT GCA CGT ACT CCC CTG CCC TGA ATA AGC-3'; 5'-GCA GGG GAG TAC GTG CAT GTG ACA GAT TTG-3'; *M. baileyi* I215V: 5'-ACA CTT TTC GAC ACA GTG TGG TGG TAC CAT ATG-3'; 5'-CAC CAC ACT GTG TCG AAA AGT GTG CTT ATC-3'; *Microtus oeconomus* V86A: 5'-CGG TGA CCC CTG CAC CAG CCA CTT CCT GGC C-3'; 5'-GCT GGT GCA GGG GTC ACC GGT GCG GGG GCC

T-3'; *Microtus oeconomus* E104S: 5'-CCC AAA AAA CCT ACC AGG GCA GCT ATG GTT TCC G-3'; 5'-GCT GCC CTG GTA GGT TTT TTG GGA CGG GAC AG-3'; *Microtus oeconomus* P258S: 5'-CCA TTA TCA CAC TGG AAG ACT CCA GTG GGA AC-3'; 5'-AGT CTT CCA GTG TGA TAA TGG TGA GGA TGG GCC G-3'; *Microtus oeconomus* S340R: 5'-GTG AAC GCT TCA AGA TGT TCC GAG AGC TGA ATG AG-3'; 5'-CGG AAC ATC TTG AAG CGT TCA CGA CCA CGG ATC TT-3'; Human H179R: 5'-GTG AGG CGC TGC CCC CAC CGT GAG CGC TGC-3'; 5'-CGG TGG GGG CAG CGC CTC ACA ACC TCC GTC-3'; Human S106N: 5'-CCA GAA AAC CTA CCA GGG CAA CTA CGG TTT CCG-3'; 5'-TTG CCC TGG TAG GTT TTC TGG GAA GGG ACA G-3'; Human S106E: 5'-CCC AGA AAA CCT ACC AGG GCG AAT ACG GTT TCC G-3'; 5'-TTC GCC CTG GTA GGT TTT CTG GGA AGG GAC AGA AG-3'. For human *p53* target luciferase constructs, the sequences of human *IGFBP3*, *Apaf1*, *Bax*, *Puma*, *Noxa*, *p21*, and *Hdm2* promoters were identified from the GenBank. The promoter sequences containing the *p53* response elements of the promoters were subcloned into pGL3-basic reporter plasmids to construct the reporter plasmids. The subcloned fragments range from the position upstream of response elements to a position downstream of the transcription starting site (+1). For the *Bcl-2* promoter, a fragment ~ 1,000 bp upstream of the transcription starting site was ligated into a pGL3-basic reporter vector (9). All fragments ligated into the vectors were sequenced to confirm authenticity.

**Transient Transfection and Dual-Luciferase Reporter Assay.** Transient transfection was performed using PolyJet transfection reagent (SignaGen Laboratories). H1299 and HeLa cells were plated in 24-well plates at 100,000 cells per well for 24 h. Then the medium was replaced with a complete medium of serum and antibiotics 30–60 min before transfection. Cells were cotransfected with a mixture of 0.36  $\mu$ g *p53* expression plasmids and 0.18  $\mu$ g luciferase

reporter constructs. Cells were harvested 48 h posttransfection, and dual-luciferase reporter assays were performed using a dual-luciferase reporter assay system (Promega). Results were normalized to *Renilla* luciferase values (pRL-CMV vector; Promega).

**Flow Cytometry.** For cell-cycle arrest and apoptosis, cells were harvested and fixed in cold 70% (vol/vol) ethanol at 4 °C overnight. The next day, cells were rehydrated in cold PBS, incubated with RNase A and 50  $\mu$ g/mL propidium iodide for 30 min, and then were analyzed by flow cytometry (Beckman FC 500 MCL) for DNA content (red channel). For *p53*-transfected cells, GFP-tagged *p53* expression plasmids were transfected into NCI-H1299 or HeLa cells. At 48 h posttransfection, cells were collected, fixed, stained as described above and were analyzed using flow cytometry. Samples were gated to GFP<sup>+</sup> cells (green channel), and the DNA content was analyzed, confirming that all the analyzed cells expressed transfected *p53*. Apoptosis induced by *p53* was calculated as the percentage of cells with sub-G1 DNA content minus the percentage that transfected with empty vector.

For apoptosis under stress, transfected cells were collected and stained with 7-amino-actinomycin D (7-AAD) for 15 min at room temperature and were incubated with Annexin V-phycoerythrin for 15 min at room temperature. Then the cells were subjected to flow cytometry. Samples were gated to GFP<sup>+</sup> cells and the staining of phycoerythrin and 7-AAD. Apoptosis induced by *p53* was calculated as the percentage of cells with positive phycoerythrin staining and negative 7-AAD staining.

**Statistical Analysis.** Statistical analysis was performed using SPSS 16.0 software. Statistical significance compared with the control was determined with a two-tailed, unpaired Student *t* test. Comparisons among multiple groups were determined by one-way ANOVA, followed by the Least Significant Difference test.

1. Corpet F (1988) Multiple sequence alignment with hierarchical clustering. *Nucleic Acids Res* 16(22):10881–10890.
2. Saitou N, Nei M (1987) The neighbor-joining method: A new method for reconstructing phylogenetic trees. *Mol Biol Evol* 4(4):406–425.
3. Yang Z (2007) PAML 4: Phylogenetic analysis by maximum likelihood. *Mol Biol Evol* 24(8):1586–1591.
4. Zhang J, Nielsen R, Yang Z (2005) Evaluation of an improved branch-site likelihood method for detecting positive selection at the molecular level. *Mol Biol Evol* 22(12):2472–2479.
5. Cao YB, Chen XQ, Wang S, Wang YX, Du JZ (2008) Evolution and regulation of the downstream gene of hypoxia-inducible factor-1 $\alpha$  in naked carp (*Gymnocypris przewalskii*) from Lake Qinghai, China. *J Mol Evol* 67(5):570–580.
6. Shiraishi K, et al. (2004) Isolation of temperature-sensitive *p53* mutations from a comprehensive missense mutation library. *J Biol Chem* 279(1):348–355.
7. Villiard E, et al. (2007) Urodele *p53* tolerates amino acid changes found in *p53* variants linked to human cancer. *BMC Evol Biol* 7:180.
8. Reichert M, Steinbach JP, Supra P, Weller M (2002) Modulation of growth and radiochemosensitivity of human malignant glioma cells by acidosis. *Cancer* 95(5):1113–1119.
9. Kajimura S, Aida K, Duan C (2006) Understanding hypoxia-induced gene expression in early development: in vitro and in vivo analysis of hypoxia-inducible factor 1-regulated zebra fish insulin-like growth factor binding protein 1 gene expression. *Mol Cell Biol* 26(3):1142–1155.

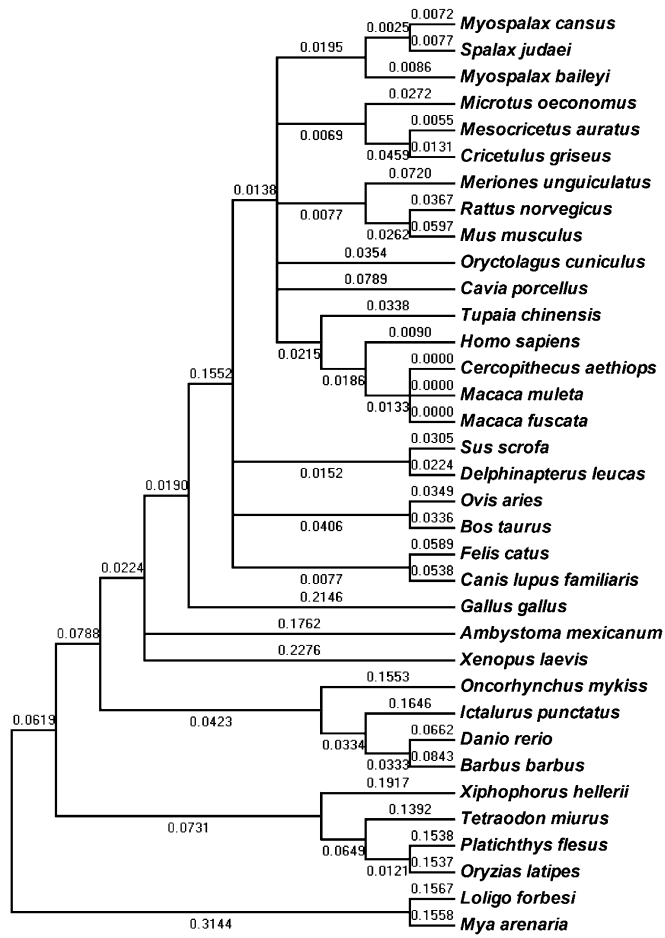

**Fig. S1.** Molecular phylogenetic trees based on the amino acid sequence of *p53* from *M. baileyi*, *M. cansus*, and *Microtus oeconomus* together with 32 other species with bootstrap test (500 replications).



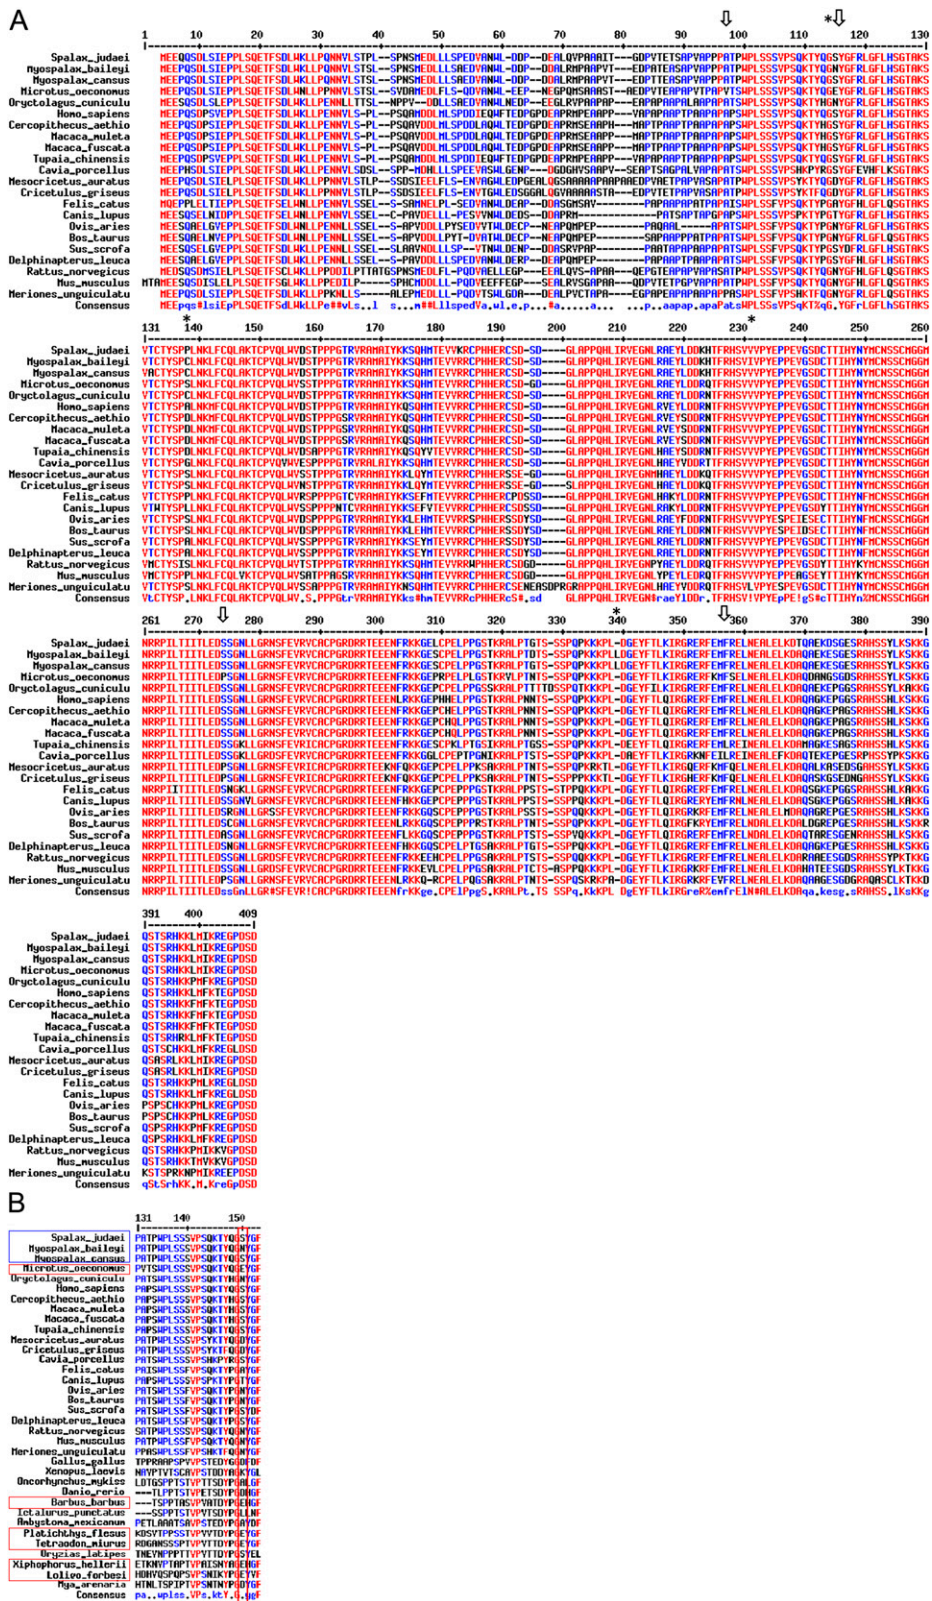

Fig. S2. p53 sequence alignment. (A) Alignment of mammal p53 sequences. (B) Alignment of p53 sequences of 35 species around the region containing the codon relative to human codon 106. All p53 sequences of species other than *Myospalax baileyi*, *Myospalax cansus*, and *Microtus oeconomus* are from GenBank.

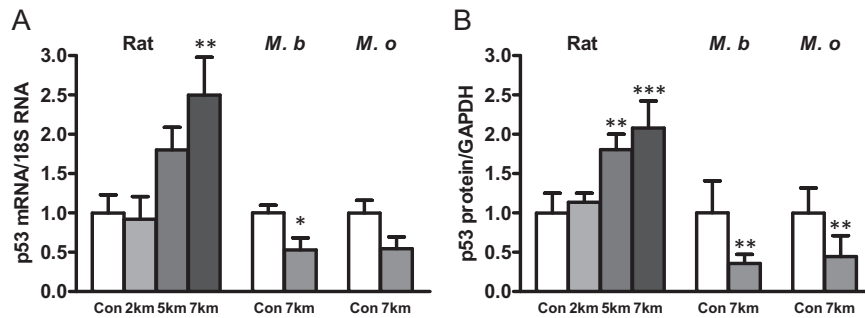

**Fig. 53.** *p53* mRNA expression and protein in *M. bailey* (*M.b.*) and *Microtus oeconomus* (*M.o.*) liver under hypoxia. (A) *p53* mRNA and (B) protein levels in rat, *M.b.*, and *M.o.* liver under hypoxia treatment (2 km: 16.0% O<sub>2</sub>, 5 km: 10.8% O<sub>2</sub>, 7 km: 8.0% O<sub>2</sub>). Results are mean  $\pm$  SEM for mRNA and mean  $\pm$  SD for protein ( $n = 6$ ). \* $P < 0.05$ , \*\* $P < 0.01$ , \*\*\* $P < 0.001$  (unpaired  $t$  test) compared with control.

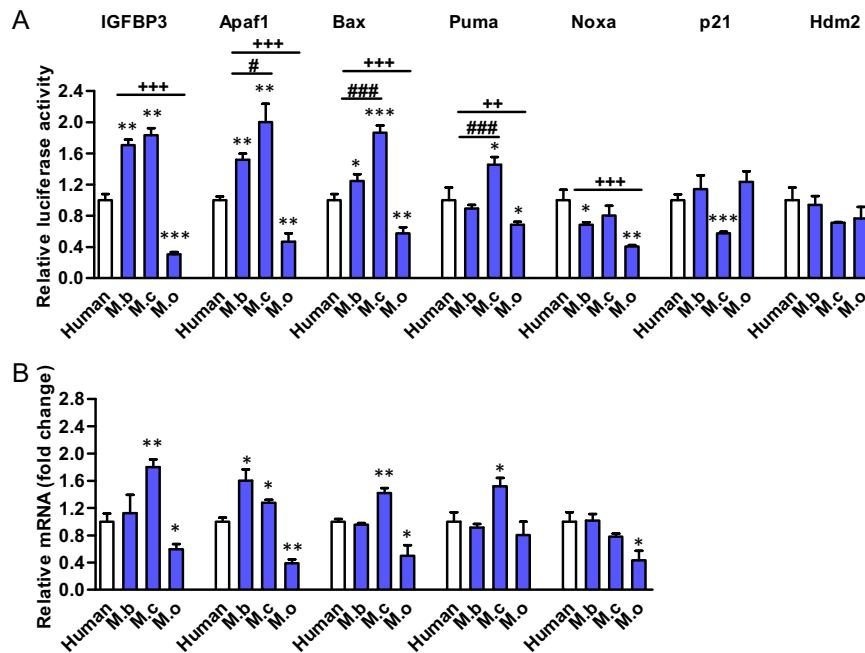

**Fig. 54.** Differential transactivation of human, *M. bailey* (*M.b.*), *M. cansus* (*M.c.*), and *Microtus oeconomus* (*M.o.*) *p53* target genes. (A) Transcription of *p53* target genes was determined by dual-luciferase reporter assay. Results shown represent mean  $\pm$  SD. \* $P < 0.05$ , \*\* $P < 0.01$ , \*\*\* $P < 0.001$  (unpaired  $t$  test) compared with human WT *p53*. # $P < 0.05$ , ### $P < 0.001$ , *M.b.* vs. *M.c.* WT *p53*. ++ $P < 0.02$ , +++ $P < 0.001$  *M.b.* and *M.o.* mutants vs. WT *p53*. (B) Expression of endogenous *p53* target genes induced by human, *M.b.*, *M.c.*, and *M.o.* as determined by quantitative real-time PCR. Results shown represent mean  $\pm$  SEM. \* $P < 0.05$ , \*\* $P < 0.01$  (unpaired  $t$  test) compared with human WT *p53*.



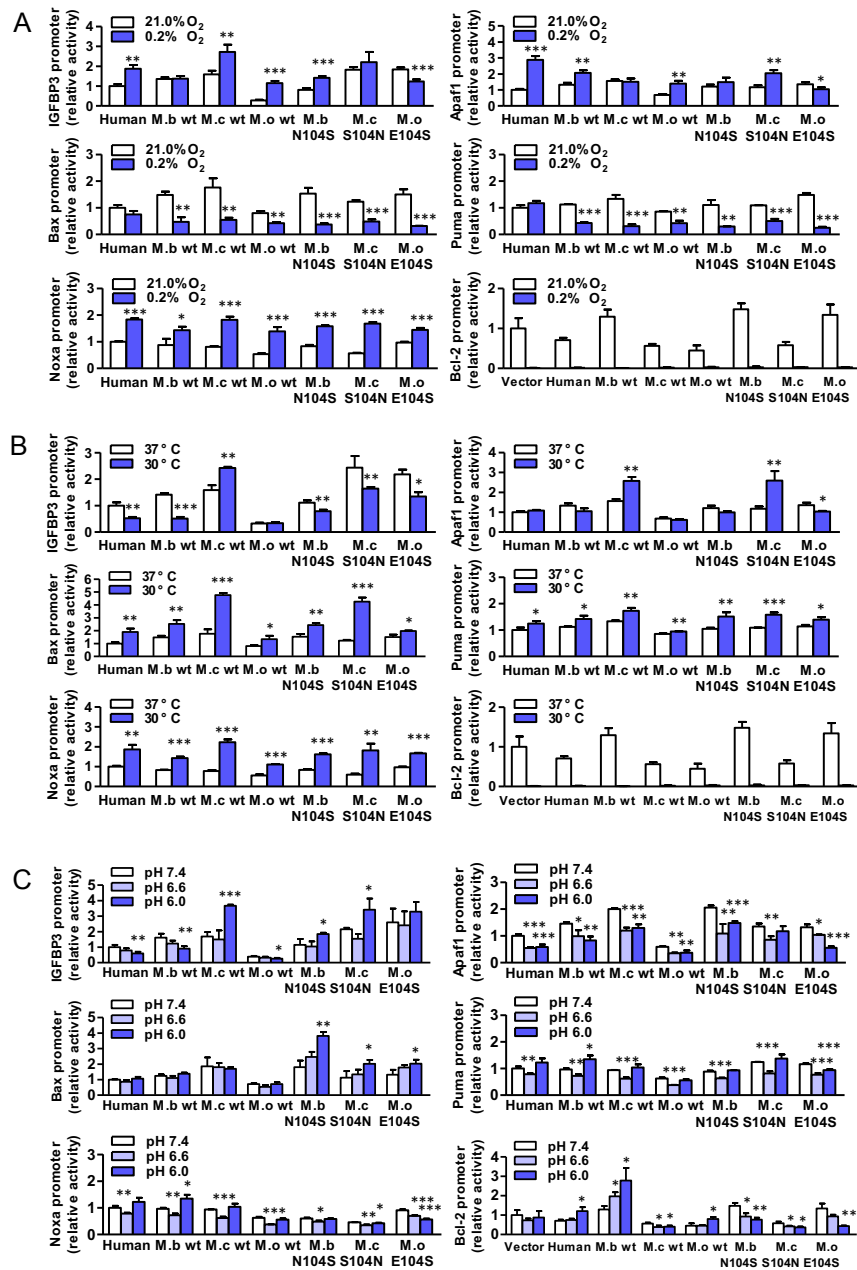

**Fig. S6.** Transactivation of human, *Myospalax baileyi* (*M.b.*), *Myospalax cansus* (*M.c.*), and *Microtus oeconomicus* (*M.o.*) p53 and their mutants toward apoptosis target genes under (A) hypoxia (0.2% O<sub>2</sub>), (B) cold (30 °C), and (C) acidic stresses. At 6 h posttransfection, cell medium was replaced, and cells were moved to an incubator with 0.2% O<sub>2</sub> or 30 °C for 18 h for hypoxia or cold challenge, respectively. For acidic stresses, medium was replaced with medium with pH 6.6 or pH 6.0 for 18 h. Results shown represent mean  $\pm$  SD. \**P* < 0.05, \*\**P* < 0.01, \*\*\**P* < 0.001 (unpaired *t* test) compared with control.

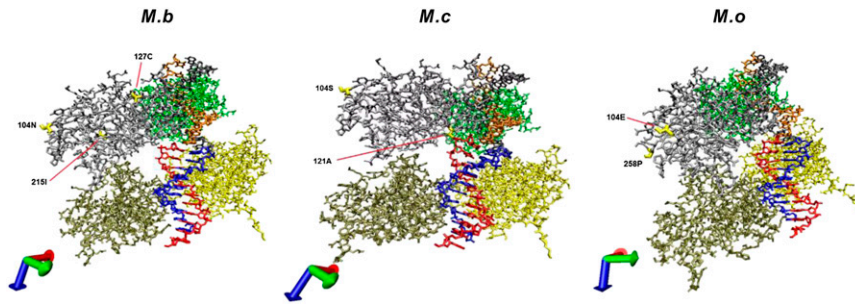

**Fig. S7.** 3D structure of a tetramer of *p53* binding to DNA double strands. The corresponding location of the variant sites 104N, 127C, and 215I in the *Myospalax baileyi* (*M.b.*), 104S and 121A in *Myospalax cansus* (*M.c.*), and 104E and 258P in *Microtus oeconomus* (*M.o.*) *p53* core domain is highlighted in yellow. The model is from Kitayner et al. (1), (Protein Data Bank ID: 2ATA). The presentation was created using VMD software and rendered using POV-Ray software (coloring method: Chain; drawing method: Bonds).

1. Kitayner M et al. (2006) Structural basis of DNA recognition by *p53* tetramers. *Mol Cell* 22(6):741–753.

**Table S1.** Summarized differential responses of *p53* from *Myospalax baileyi*, *Myospalax cansus*, and *Microtus oeconomus* in cells cultured under normal conditions

| Species ( <i>p53</i> codon 104 mutation) | Apoptotic genes | <i>Bcl-2</i> | Apoptosis |
|------------------------------------------|-----------------|--------------|-----------|
| <i>Myospalax baileyi</i> (104N)          | ↑               | ↑            | –         |
| <i>Myospalax cansus</i> (104S)           | ↑               | ↓            | ↑         |
| <i>Microtus oeconomus</i> (104E)         | ↓               | ↓            | ↓         |

↑, up-regulation; ↓, down-regulation; –, unchanged.

**Table S2.** Summarized differential responses of *p53* from *Myospalax baileyi*, *Myospalax cansus*, and *Microtus oeconomus* in cells cultured under stress conditions

| Species<br>( <i>p53</i> codon 104 mutation) | Hypoxia       |              |           | Acidic stress |           | Cold          |              |           |
|---------------------------------------------|---------------|--------------|-----------|---------------|-----------|---------------|--------------|-----------|
|                                             | <i>IGFBP3</i> | <i>Apaf1</i> | Apoptosis | <i>Bcl-2</i>  | Apoptosis | <i>IGFBP3</i> | <i>Apaf1</i> | Apoptosis |
| <i>Myospalax baileyi</i> (104N)             | –             | ↑            | ↓         | ↑             | ↓         | ↓             | –            | ↓         |
| <i>Myospalax cansus</i> (104S)              | ↑             | –            | ↓         | ↓             | –         | ↑             | ↑            | –         |
| <i>Microtus oeconomus</i> (104E)            | ↑             | ↑            | ↓         | –             | –         | –             | –            | –         |

↑, up-regulation; ↓, down-regulation; –, unchanged.
